# Supplementary material for: Green and rapid synthesis of biomass carbon dot-based fluorescence sensing for the sensitive determination of oxytetracycline
Source: Royal Society of Chemistry journal article supplement (doi:10.1039/d2ay02031a), 2023-01-01
Supplement: d2ay02031a1.pdf [file d2ay02031a1.pdf]

## Green and rapidly synthesis of biomass carbon dots-based fluorescence sensing for the sensitive determination of oxytetracycline

Qianji Li<sup>1</sup>, Xiwen Wu<sup>2</sup>, Xiaohuan Zhang<sup>3</sup>, Wenen Su<sup>1</sup>, Yan Tan<sup>1</sup>, Pengfei Fan<sup>1</sup>,  
Jinquan Liu<sup>1\*</sup>, Shengyuan Yang<sup>1\*</sup>

1 Department of Public Health Laboratory Sciences, School of Public Health, Hengyang Medical School, University of South China, Hengyang, Hunan, 421001, People's Republic of China.

2 Yueyang County Center For Disease Control and Prevention, Yueyang, Hunan, 414100, People's Republic of China

3 Yongding District Center For Disease Control and Prevention, Zhangjiajie, Hunan, 427000, People's Republic of China

\* Corresponding authors: Jinquan Liu, email: [letliu@163.com](mailto:letliu@163.com); Shengyuan Yang, email: yangshyhy@126.com.

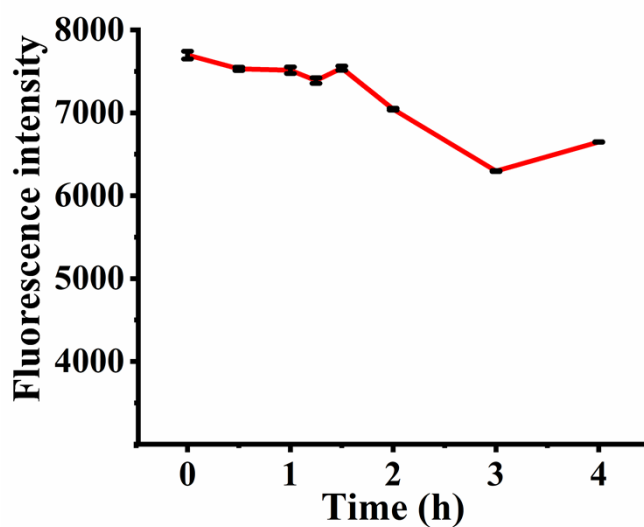

Supplemental Fig. S1 The stability of CDs at 50 °C at different times

Supplemental Table S1 Comparison of linear range and LOD between CDs and other sensors.

| Fluorescent probe            | Linear Range ( $\mu\text{mol L}^{-1}$ ) | LOD ( $\mu\text{mol L}^{-1}$ ) | Reference |
|------------------------------|-----------------------------------------|--------------------------------|-----------|
| N-CDs@mMIPs                  | 0-100                                   | 0.035                          | 31        |
| ON-CQDs                      | 2-100                                   | 0.973                          | 13        |
| CDs-based fluorometric probe | 0-40                                    | 0.41                           | 32        |
| m-CDs                        | 1-300                                   | 0.36                           | 33        |
| GUCDs                        | 0.5-25                                  | 0.165                          | 34        |
| N-CQDs                       | 3.32–32.26                              | 0.3739                         | 35        |
| CDs                          | 4-100                                   | 0.12                           | This work |

## References:

- 31 Y. Q. Xu, T. Huang, S. Wang and Y. S. Yan, *J. Food Compos. Anal.*, 2022, **108**, 104427.
- 32 Y. Z. Fu, L. Huang, S. J. Zhao, X. J. Xing, M. H. Lan and X. Z. Song, *Spectroc. Acta Pt. A-Molec. Biomolec. Spectr.*, 2021, **246**, 118947.
- 33 D. Y. Long, J. D. Peng, H. J. Peng, H. Xian, S. Y. Li, X. Wang, J. Chen, Z. Y. Zhang and R. X. Ni, *Analyst*, 2019, **144**, 3307-3313.
- 34 D. Uriarte, C. Domini and M. Garrido, *Talanta*, 2019, **201**, 143-148.
- 35 H. J. Qi, M. Teng, M. Liu, S. X. Liu, J. Li, H. P. Yu, C. B. Teng, Z. H. Huang, H. Liu, Q. Shao, A. Umar, T. Ding, Q. Gao and Z. H. Guo, *J. Colloid Interface Sci.*, 2019, **539**, 332-341.
